# Supplementary material for: Association of comorbidity and health service usage among patients with dementia in the UK: a population-based study
Source: PubMed Central journal article supplement — BMJ Open. 2017 Mar 9;7(3):e012546. doi: 10.1136/bmjopen-2016-012546 (PMC5353300; doi:10.1136/bmjopen-2016-012546), 2017-03-09
Supplement: bmjopen-2016-012546supp_appendix1.pdf [file bmjopen-2016-012546supp_appendix1.pdf]

## Appendix 1. Case Definition of Dementia

**Criteria:** Dementia diagnosis in primary care clinical charts or referrals to secondary care recorded between March 2008 and February 2009. Including the following diagnoses;

|    |                                                           |    |                                                        |
|----|-----------------------------------------------------------|----|--------------------------------------------------------|
| 1  | H/O: dementia                                             | 34 | Dementia in Alzheimer's disease; unspecified           |
| 2  | Uncomplicated senile dementia                             | 35 | Alzheimer's dementia unspecified                       |
| 3  | Presenile dementia                                        | 36 | Vascular dementia                                      |
| 4  | Uncomplicated presenile dementia                          | 37 | Vascular dementia of acute onset                       |
| 5  | Senile dementia                                           | 38 | Multi-infarct dementia                                 |
| 6  | Presenile dementia with delirium                          | 39 | Arteriosclerotic dementia                              |
| 7  | Senile/presenile dementia                                 | 40 | Predominantly cortical dementia                        |
| 8  | Presenile dementia with paranoia                          | 41 | Subcortical vascular dementia                          |
| 9  | Presenile dementia with depression                        | 42 | Mixed cortical and subcortical vascular dementia       |
| 10 | Presenile dementia NOS†                                   | 43 | Other vascular dementia                                |
| 11 | Senile dementia with depressive or paranoid features      | 44 | Vascular dementia; unspecified                         |
| 12 | Senile dementia with paranoia                             | 45 | Unspecified dementia                                   |
| 13 | Senile dementia with depression                           | 46 | Primary degenerative dementia NOS                      |
| 14 | Senile dementia with depressive or paranoid features NOS  | 47 | Senile dementia NOS                                    |
| 15 | Senile dementia with delirium                             | 48 | Senile dementia; depressed or paranoid type            |
| 16 | Arteriosclerotic dementia                                 | 49 | Delirium superimposed on dementia                      |
| 17 | Uncomplicated arteriosclerotic dementia                   | 50 | Alzheimer's disease                                    |
| 18 | Arteriosclerotic dementia with delirium                   | 51 | Alzheimer's disease with early onset                   |
| 19 | Multi infarct dementia                                    | 52 | Alzheimer's disease with late onset                    |
| 20 | Arteriosclerotic dementia with paranoia                   | 53 | Other Alzheimer's disease                              |
| 21 | Arteriosclerotic dementia with depression                 | 54 | Presenile Dementia                                     |
| 22 | Arteriosclerotic dementia NOS                             | 55 | Other alcoholic dementia                               |
| 23 | Dementia in conditions EC                                 | 56 | Alcoholic dementia NOS                                 |
| 24 | Dementia in Alzheimer's disease                           | 57 | Dementia in other diseases classified elsewhere        |
| 25 | Dementia in Alzheimer's disease with early onset          | 58 | Dementia in Pick's disease                             |
| 26 | Presenile dementia; Alzheimer's type                      | 59 | Dementia in Creutzfeldt-Jakob disease                  |
| 27 | Primary degen dementia; Alzheimer's type; presenile onset | 60 | Dementia in Huntington's disease                       |
| 28 | Alzheimer's disease type 2                                | 61 | Dementia in Parkinson's disease                        |
| 29 | Dementia in Alzheimer's disease with late onset           | 62 | Dementia in human immunodef virus [HIV] disease        |
| 30 | Alzheimer's disease type 1                                | 63 | Dementia in other specified diseases classif elsewhere |
| 31 | Senile dementia; Alzheimer's type                         | 64 | Alcoholic dementia NOS                                 |
| 32 | Primary degen dementia of Alzheimer's type; senile onset  | 65 | Pick's disease                                         |
| 33 | Dementia in Alzheimer's dis; atypical or mixed type       |    |                                                        |

**Note:** Diagnosis as written in CPRD Medical Dictionary. Even when similar, each diagnosis represents one independent code.

†Not otherwise specified
