# Supplementary material for: Association of comorbidity and health service usage among patients with dementia in the UK: a population-based study
Source: PubMed Central journal article supplement — BMJ Open. 2017 Mar 9;7(3):e012546. doi: 10.1136/bmjopen-2016-012546 (PMC5353300; doi:10.1136/bmjopen-2016-012546), 2017-03-09
Supplement: bmjopen-2016-012546supp_appendix2.pdf [file bmjopen-2016-012546supp_appendix2.pdf]

## Appendix 2. Selected Comorbidities

| Comorbidity                                                 | Criteria                                                                                                                                                                 |
|-------------------------------------------------------------|--------------------------------------------------------------------------------------------------------------------------------------------------------------------------|
| 1 Hypertension                                              | Code ever recorded                                                                                                                                                       |
| 2 Depression                                                | Code recorded in last 12 months OR $\geq 4$ anti-depressant prescriptions (excluding low dose tricyclics) in last 12 months                                              |
| 3 Diabetes                                                  | Code ever recorded                                                                                                                                                       |
| 4 COPD                                                      | Code ever recorded                                                                                                                                                       |
| 5 Cancer                                                    | Code recorded in last 5 years                                                                                                                                            |
| 6 Coronary Heart Disease                                    | Code ever recorded                                                                                                                                                       |
| 7 Alcohol Problems                                          | Code ever recorded                                                                                                                                                       |
| 8 Substance Misuse                                          | Code ever recorded                                                                                                                                                       |
| 9 Learning Disability                                       | Code ever recorded                                                                                                                                                       |
| 10 Multiple Sclerosis                                       | Code ever recorded                                                                                                                                                       |
| 11 Parkinson's Disease                                      | Code ever recorded                                                                                                                                                       |
| 12 Epilepsy                                                 | Code ever recorded AND antiepileptic prescription in last 12 months                                                                                                      |
| 13 Migraine*                                                | Code ever recorded                                                                                                                                                       |
| 14 Blindness                                                | Code ever recorded                                                                                                                                                       |
| 15 Anorexia & Bulimia                                       | Code ever recorded                                                                                                                                                       |
| 16 Chronic Sinusitis                                        | Code ever recorded                                                                                                                                                       |
| 17 Peripheral Vascular Disease                              | Code ever recorded                                                                                                                                                       |
| 18 Inflammatory Bowel Syndrome                              | Code ever recorded                                                                                                                                                       |
| 19 Treated Constipation*                                    | Code ever recorded                                                                                                                                                       |
| 20 Diverticular Disease of Intestine                        | Code ever recorded                                                                                                                                                       |
| 21 Bronchiectasis                                           | Code ever recorded                                                                                                                                                       |
| 22 Schizophrenia                                            | Code ever recorded/recorded in last 12 months OR Lithium prescribed in last 168 days                                                                                     |
| 23 Prostate Disorders                                       | Code ever recorded                                                                                                                                                       |
| 24 Hearing Loss                                             | Code ever recorded                                                                                                                                                       |
| 25 Heart Failure                                            | Code ever recorded                                                                                                                                                       |
| 26 Thyroid Disorders                                        | Code ever recorded                                                                                                                                                       |
| 27 Psoriasis and Eczema                                     | Read code ever recorded AND $\geq 4$ related prescriptions in last 12 months (excluding simple emollients)                                                               |
| 28 Asthma                                                   | Read code ever recorded AND any prescription in last 12 months                                                                                                           |
| 29 Painful Condition                                        | $\geq 4$ prescription only medicine analgesic prescriptions in last 12 months OR $\geq 4$ specified anti-epileptics in the absence of an epilepsy code in last 12 months |
| 30 Atrial Fibrillation                                      | Code ever recorded                                                                                                                                                       |
| 31 Stroke                                                   | Code ever recorded                                                                                                                                                       |
| 32 Rheumatoid Arthritis                                     | Code ever recorded                                                                                                                                                       |
| <b>Included in Barnett's list, excluded from this study</b> |                                                                                                                                                                          |
| 33 Treated Dyspepsia                                        | No valid set of codes developed due to increasing use of proton pump inhibitors use to prevent gastric side effects of medications                                       |
| 34 Anxiety                                                  | Significant overlapping with depression, thus little added value to included it as separate comorbidity                                                                  |
| 35 Chronic Kidney disease                                   | No valid set of codes developed (time constrain, currently being developed)                                                                                              |
| 36 Glaucoma                                                 | Significant overlapping with visual impairment, thus little added value to included it as separate comorbidity                                                           |
| 37 Viral Hepatitis                                          | No valid set of codes developed due to large proportion of ever recorder cases refer to asymptomatic and acute disease with no clinical relevance                        |
| 38 Chronic Liver disease                                    | No valid set of codes developed (time constrain, currently being developed)                                                                                              |
| 39 Irritable bowel disease                                  | No clinical relevance                                                                                                                                                    |
| 40 Dementia                                                 | Inclusion criteria for this study                                                                                                                                        |

\*Different Criteria from Barnett *et al*<sup>13</sup>
