# Supplementary material for: Association of comorbidity and health service usage among patients with dementia in the UK: a population-based study
Source: PubMed Central journal article supplement — BMJ Open. 2017 Mar 9;7(3):e012546. doi: 10.1136/bmjopen-2016-012546 (PMC5353300; doi:10.1136/bmjopen-2016-012546), 2017-03-09
Supplement: bmjopen-2016-012546supp_appendix3.pdf [file bmjopen-2016-012546supp_appendix3.pdf]

### Appendix 3. Primary Consultations Definition\*

|                                 |                             |
|---------------------------------|-----------------------------|
| Night Visit                     | Telephone call to a patient |
| Clinic                          | Third Party Consultation    |
| Night visit, Deputising service | Home Visit                  |
| Follow-up/routine visit         | Hotel Visit                 |
| Night visit, Local rota         | Nursing Home Visit          |
| Night visit ,practice           | Residential Home Visit      |
| Out of hours, Practice          | Twilight Visit              |
| Out of hours, Non Practice      | Triage                      |
| Surgery consultation            | Walk-in Centre              |
| Telephone call from a patient   | Co-op Telephone advice      |
| Acute visit                     | Co-op Surgery Consultation  |
| Minor Injury Service            | Co-op Home Visit            |
| Emergency Consultation          | -                           |

**Note:** Consultations as written in CPRD lookup documents. Only one consultation per day was included in each category for the analysis. Thus, for example, triage and night visit practice in the same day was considered one primary care consultation.

\*Administrative consultations excluded (e.g. NHS report)
